# Supplementary material for: Inhibition of SARS-CoV-2 pseudovirus invasion by ACE2 protecting and Spike neutralizing peptides: An alternative approach to COVID19 prevention and therapy
Source: PubMed Central journal article supplement (PMC8326117; doi:10.7150/ijbs.61476), 2021-07-13
Supplement: ijbsv17p2957s1.pdf [file ijbsv17p2957s1.pdf]

**Supplementary Table 1 RT-qPCR primers**

| <b>Gene</b>   | <b>Primer</b>    | <b>Oligonucleotide sequence (5'to 3')</b> |
|---------------|------------------|-------------------------------------------|
| ACE2          | ACE2-F           | CATTGGAGCAAGTGTTGGATCTT                   |
|               | ACE2-R           | GAGCTAATGCATGCCATTCTCA                    |
| CAV2          | CAV2-F           | TACAAGTTCCTGACGGTGTT                      |
|               | CAV2-R           | AACCATTAGGCAGGTCTTTA                      |
| CXADR         | CXADR-F          | CTCCTGCTGTGCTTCGTG                        |
|               | CXADR-R          | GGCAGATAGGCAGTTTCC                        |
| SLC1A5        | SLC1A5-F         | TTATCCGCTTCTTCAACTCC                      |
|               | SLC1A5-R         | GTAAACCCACATCCTCCATCT                     |
| EGFR          | EGFR -F          | GCCAAGGCACGAGTAACAAG                      |
|               | EGFR -R          | CAATGAGGACATAACCAGCCAC                    |
| VPS37         | VPS37-F          | AGACCCTGTTAGCACTTCTTCA                    |
|               | VPS37-R          | GTGGGCCAGTTTCCGTTT                        |
| NUP98         | NUP98-F          | CCTGACACTTCCCCTTCC                        |
|               | NUP98-R          | GTAAACCTGTCTTATGACCGAAAC                  |
| RAB1B         | RAB1B -F         | CAAGTCATGCCTGCTCCT                        |
|               | RAB1B -R         | CCATCCAGCTCGATGGTTCGGA                    |
| IFITM3        | IFITM3-F         | TCCCTGTTCAACACCCTCTTC                     |
|               | IFITM3-R         | CCAACCATCTTCCTGTCCCTA                     |
| TMPRSS2       | TMPRSS2-F        | GTGCATCACCTTGACCCTG                       |
|               | TMPRSS2-R        | GACCCTATCTCACGCTGAGG                      |
| WPRE          | WPRE -F          | ATTGCCACGGCGGAACTC                        |
|               | WPRE -R          | AGCAGCCAAGGAAAGGACGA                      |
| IL-6          | IL-6-F           | CTCCCAACAGACCTGTCTATAC                    |
|               | IL-6-R           | CCATTGCACAACTCTTTTCTCA                    |
| GAPDH         | GAPDH-F          | AGGTCGGTGTGAACGGATTTG                     |
|               | GAPDH-R          | TGTAGACCATGTAGTTGAGGTCA                   |
| CXCL10        | CXCL10-F         | CCAAGTGCTGCCGTCATTTTC                     |
|               | CXCL10-R         | GGCTCGCAGGGATGATTTCAA                     |
| CCL5          | CCL5-F           | GCTGCTTTGCCTACCTCTCC                      |
|               | CCL5-R           | TCGAGTGACAAACACGACTGC                     |
| CXCL11        | CXCL11-F         | GGCTTCCTTATGTTCAAACAGGG                   |
|               | CXCL11-R         | GCCGTTACTCGGGTAAATTACA                    |
| Ifnb          | Ifnb -F          | CAGCTCCAAGAAAGGACGAAC                     |
|               | Ifnb -R          | GGCAGTGTAACCTTTCTGCAT                     |
| CCL2          | CCL2-F           | AGGTCCCTATGGTGCCAATGT                     |
|               | CCL2-R           | CGGCAGGATTTTGAGGTCCA                      |
| IFN- $\gamma$ | IFN- $\gamma$ -F | TACCAGAACATGTCACAGACTC                    |
|               | IFN- $\gamma$ -R | ATGATCAGAAATGTTGGTGCAG                    |

## Supplementary Figures

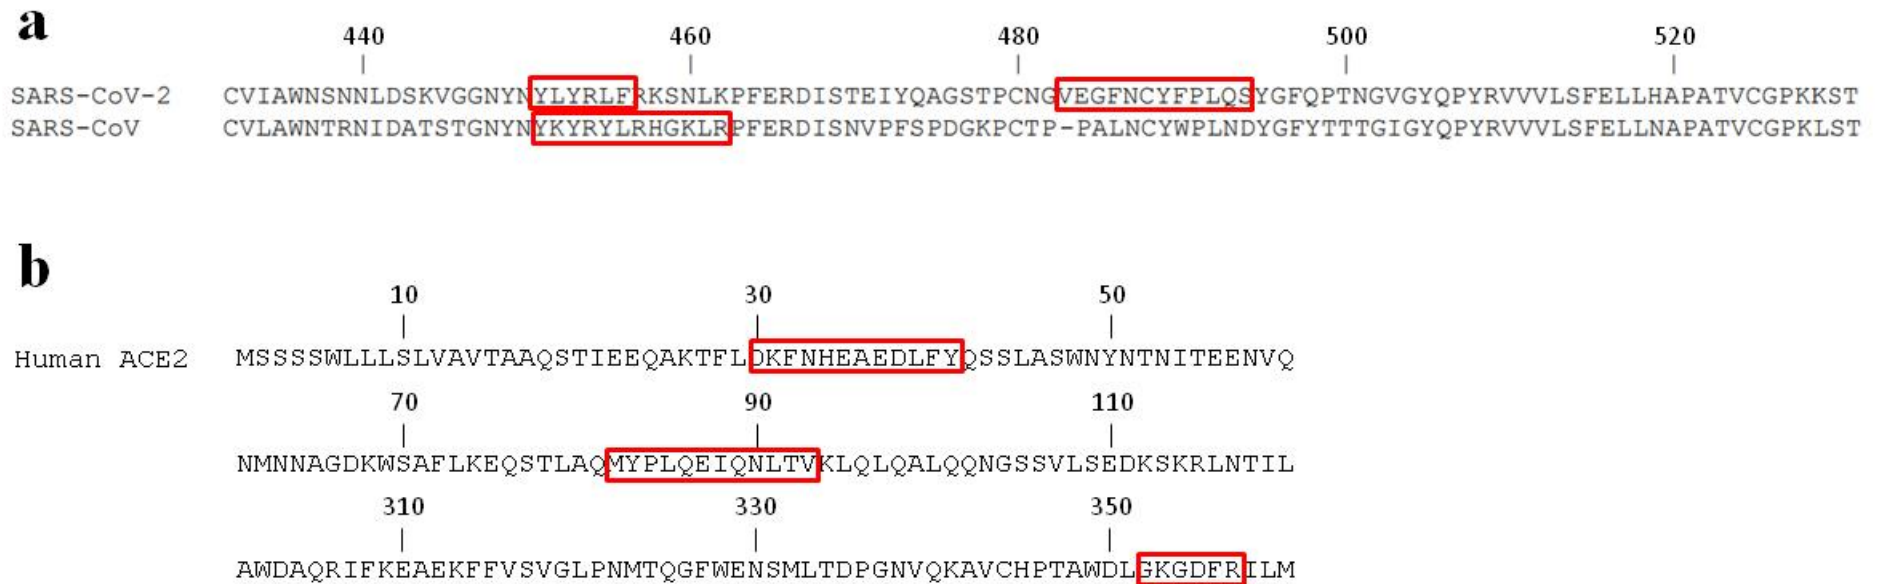

Supplementary Fig. S1 Design of S-protein neutralizing peptides and ACE2-protecting peptides. ACE2 protecting peptides (AYp1-28) were designed and modified based on the sequence of S-protein RBD region of SARS-COV-2 or SARS-COV (a). S-protein neutralizing peptides (AYn1-14) were designed and modified according to the sequence of hACE2 (b).

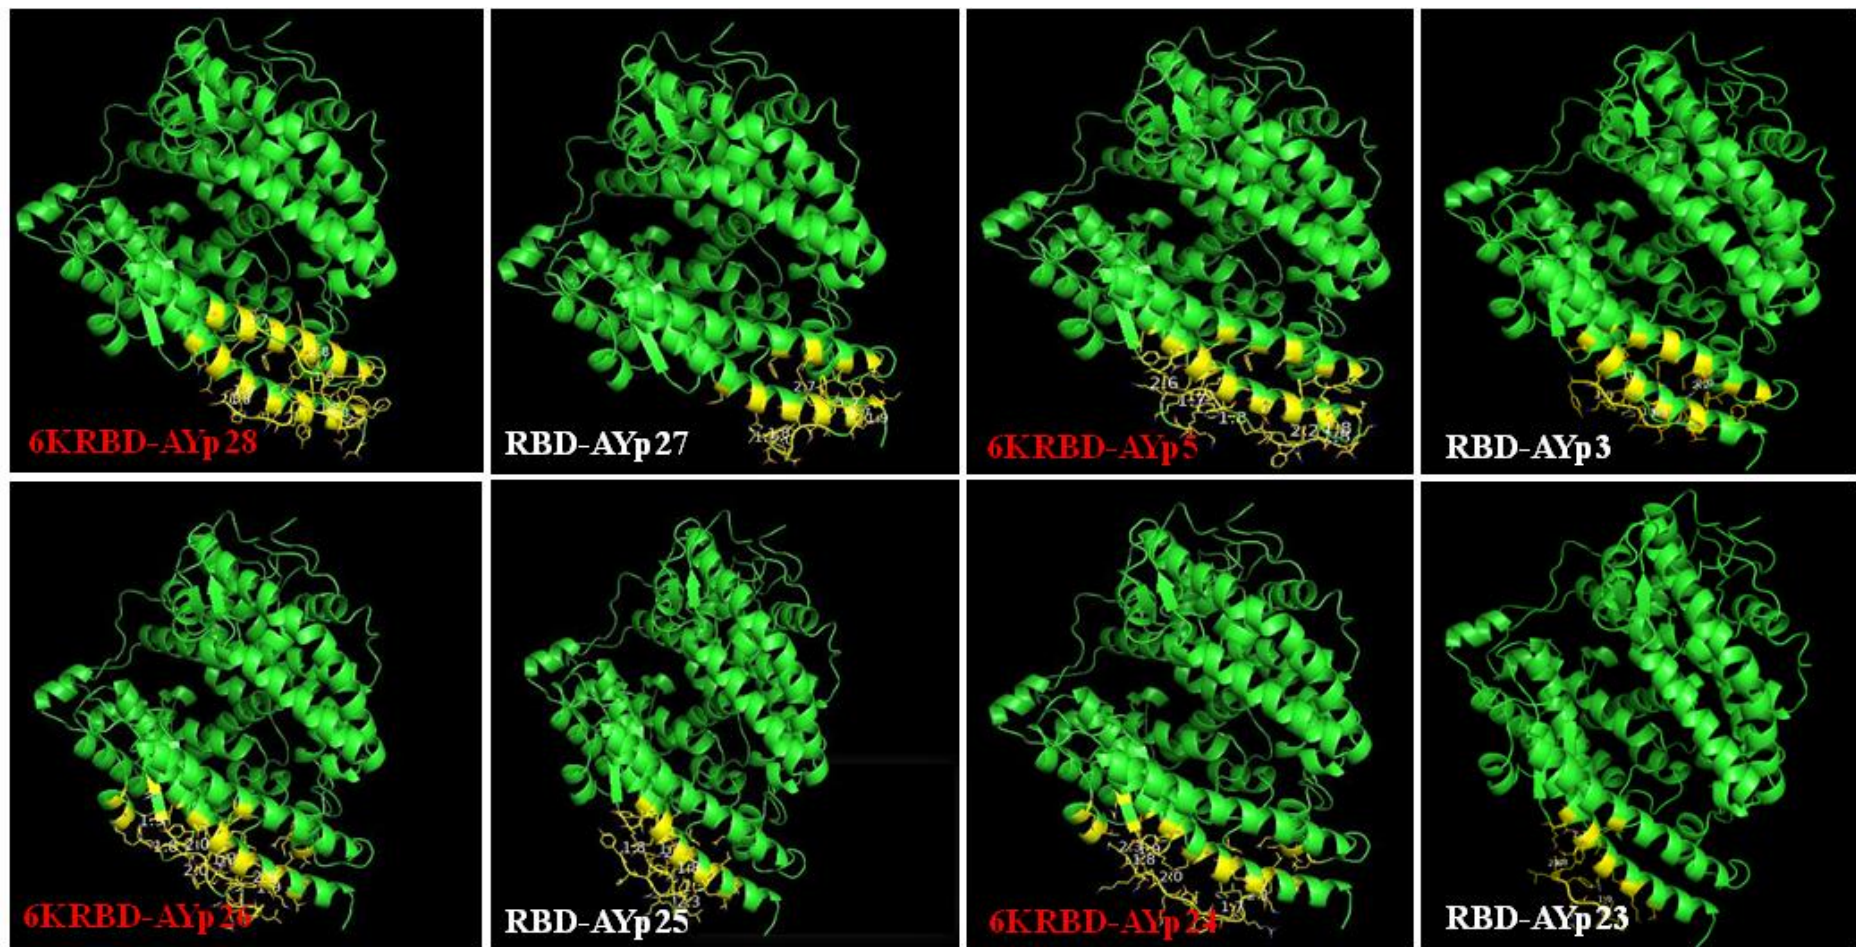

Supplementary Fig. S2 Computational simulation of interactions between ACE2-protecting peptides and ACE2 protein. Among 21 tested ACE2 protecting peptides, AYp28 showed a larger attachment surface with ACE2 protein (yellow area).

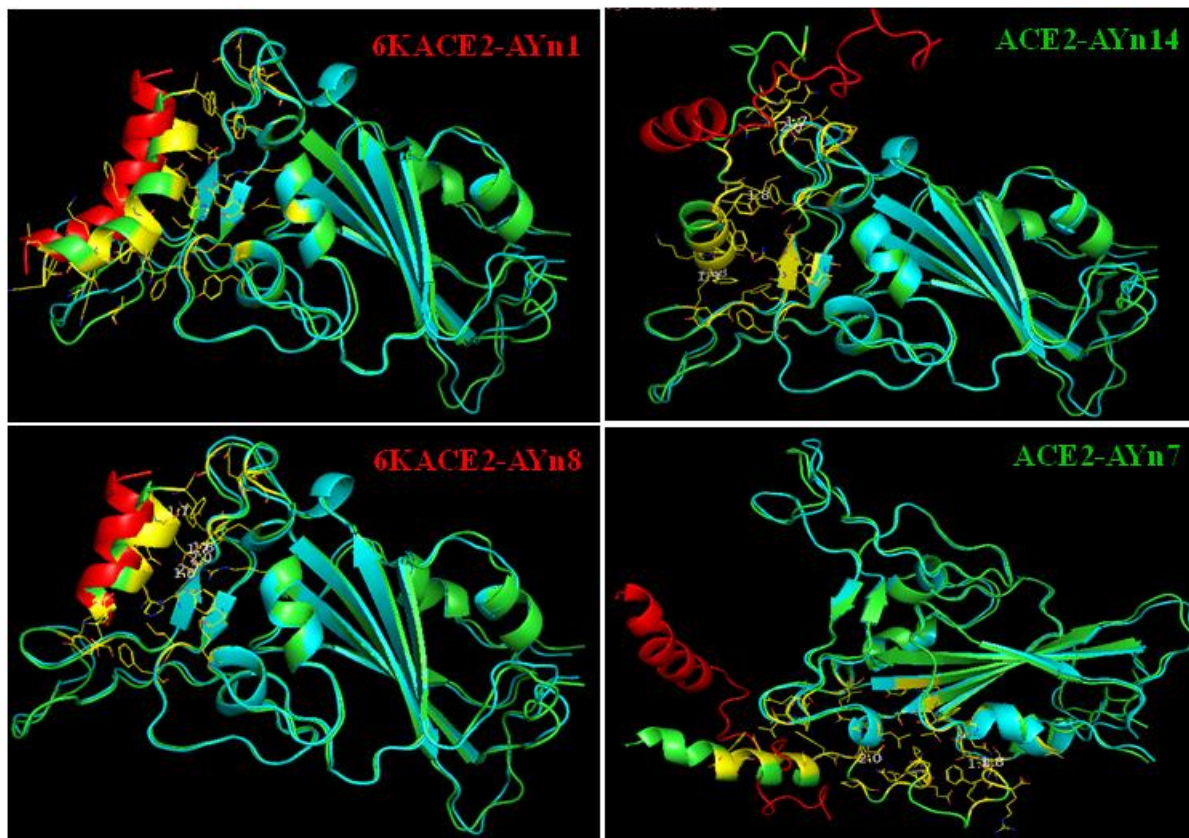

Supplementary Fig. S3 Computational simulation of interactions between S-protein-neutralizing peptides and S-protein. Among 14 tested S-protein neutralizing peptides, AYn1 presented the largest binding surface (yellow area).

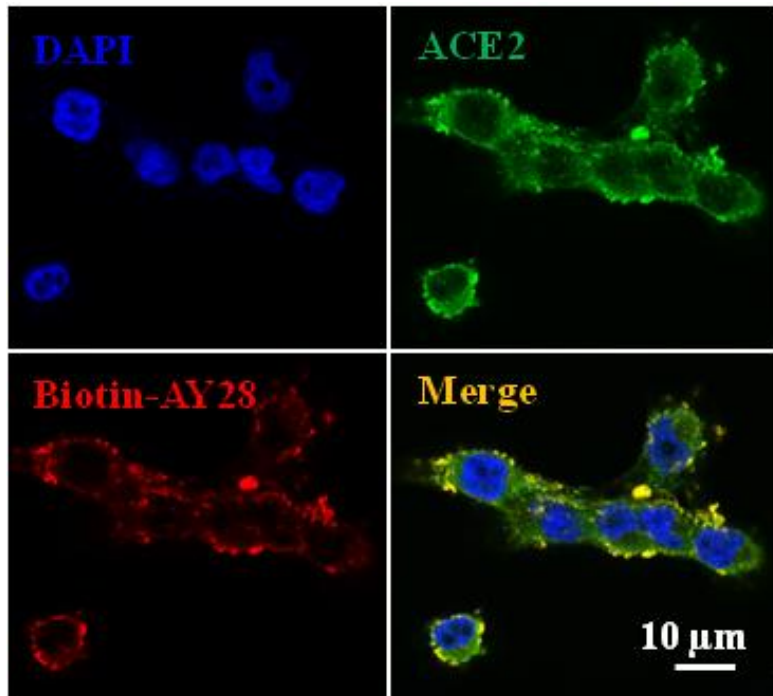

Supplementary Fig. S4 Interaction of AYp28 with ACE2 protein as assessed by confocal microscopy. **Biotin-labeled** AYp28 peptide was incubated with HEK293T/hACE2 cells and observed by confocal microscopy. Clear colocalizations of AYp28 (red) with cell membrane ACE2 (green) were found.



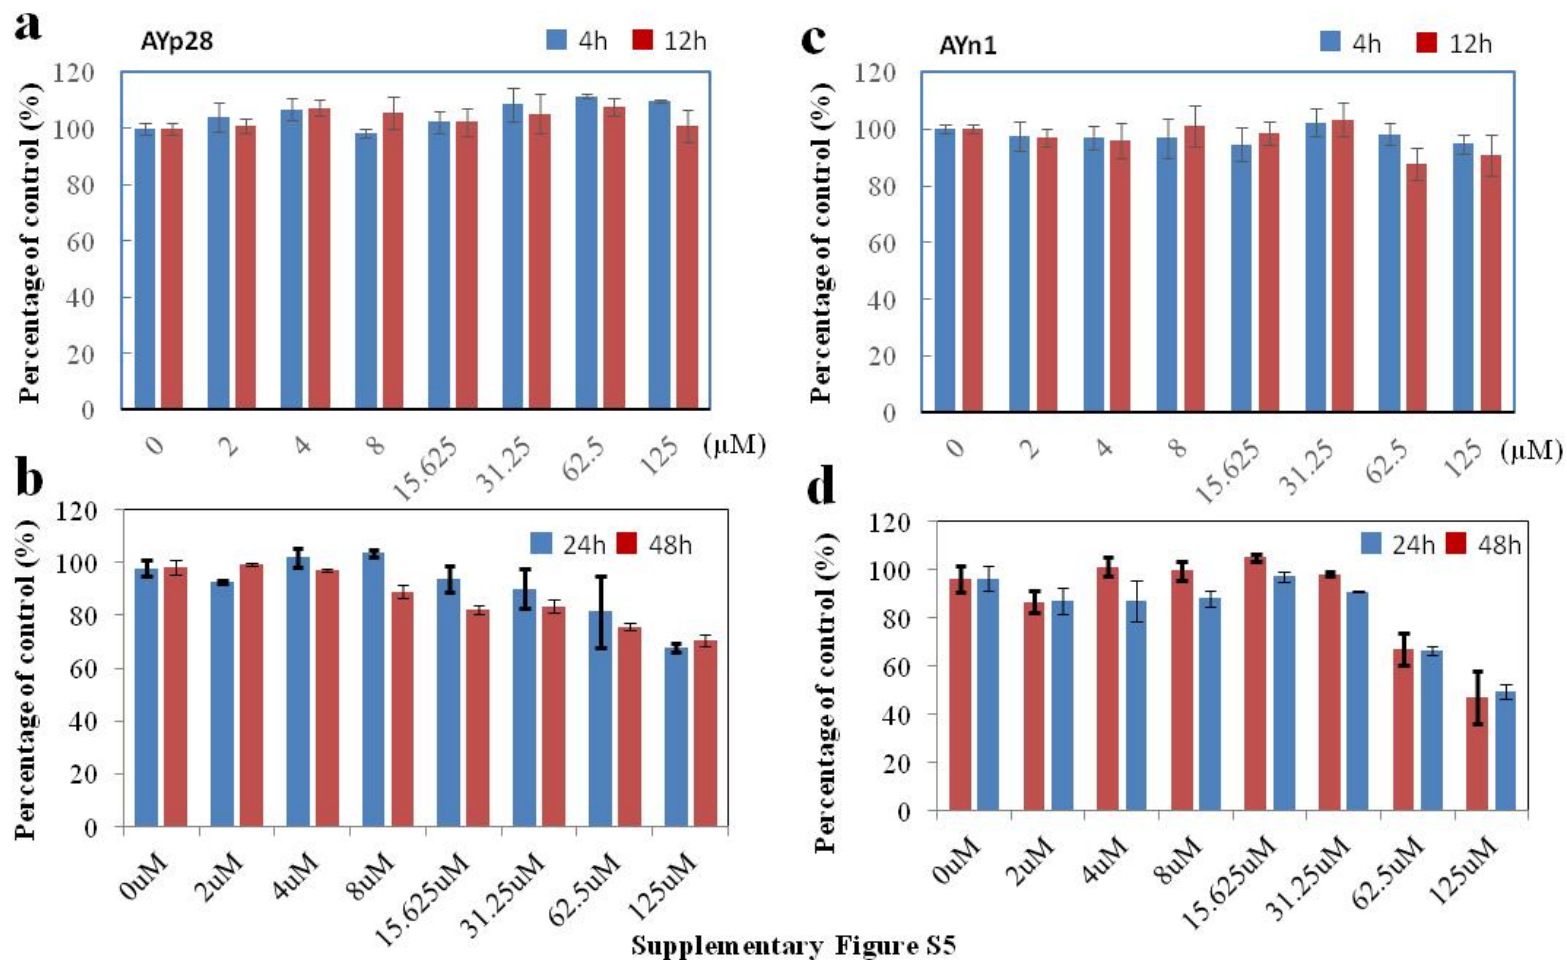

Supplementary Figure S5

Supplementary Fig. S5 Cytotoxicity of AYp28 and AYn1 in HEK293T/hACE2 cells as assessed by MTT assay.

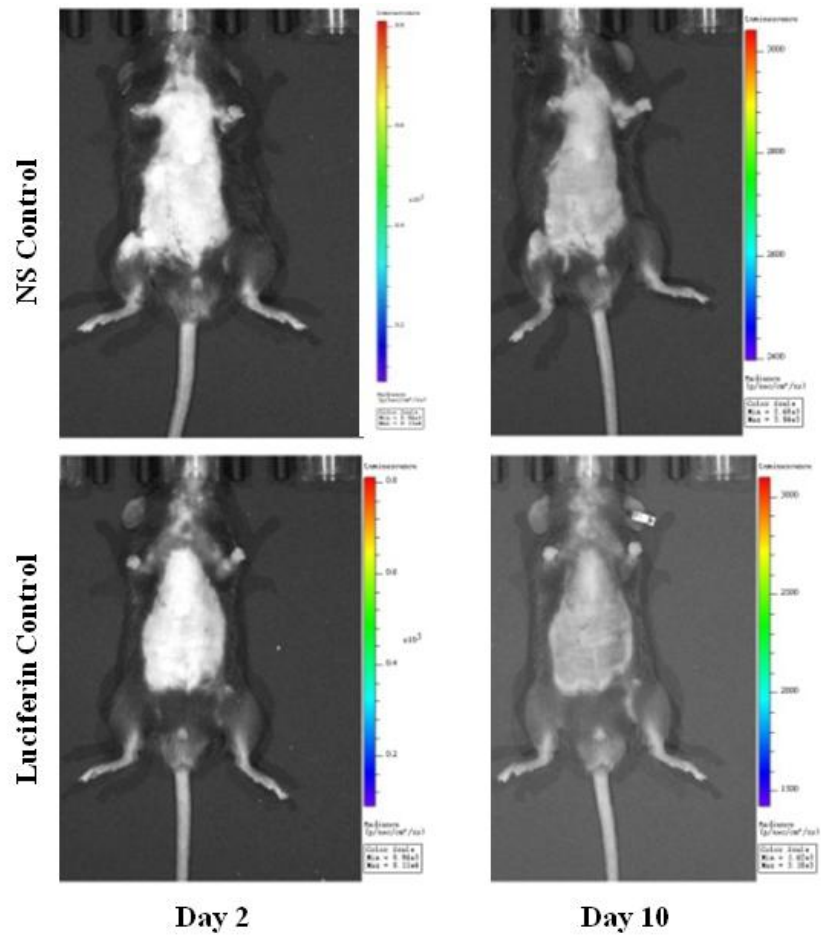

Supplementary Fig. S6 Luciferin fluorescence signal observed in PBS and luciferin control mice.

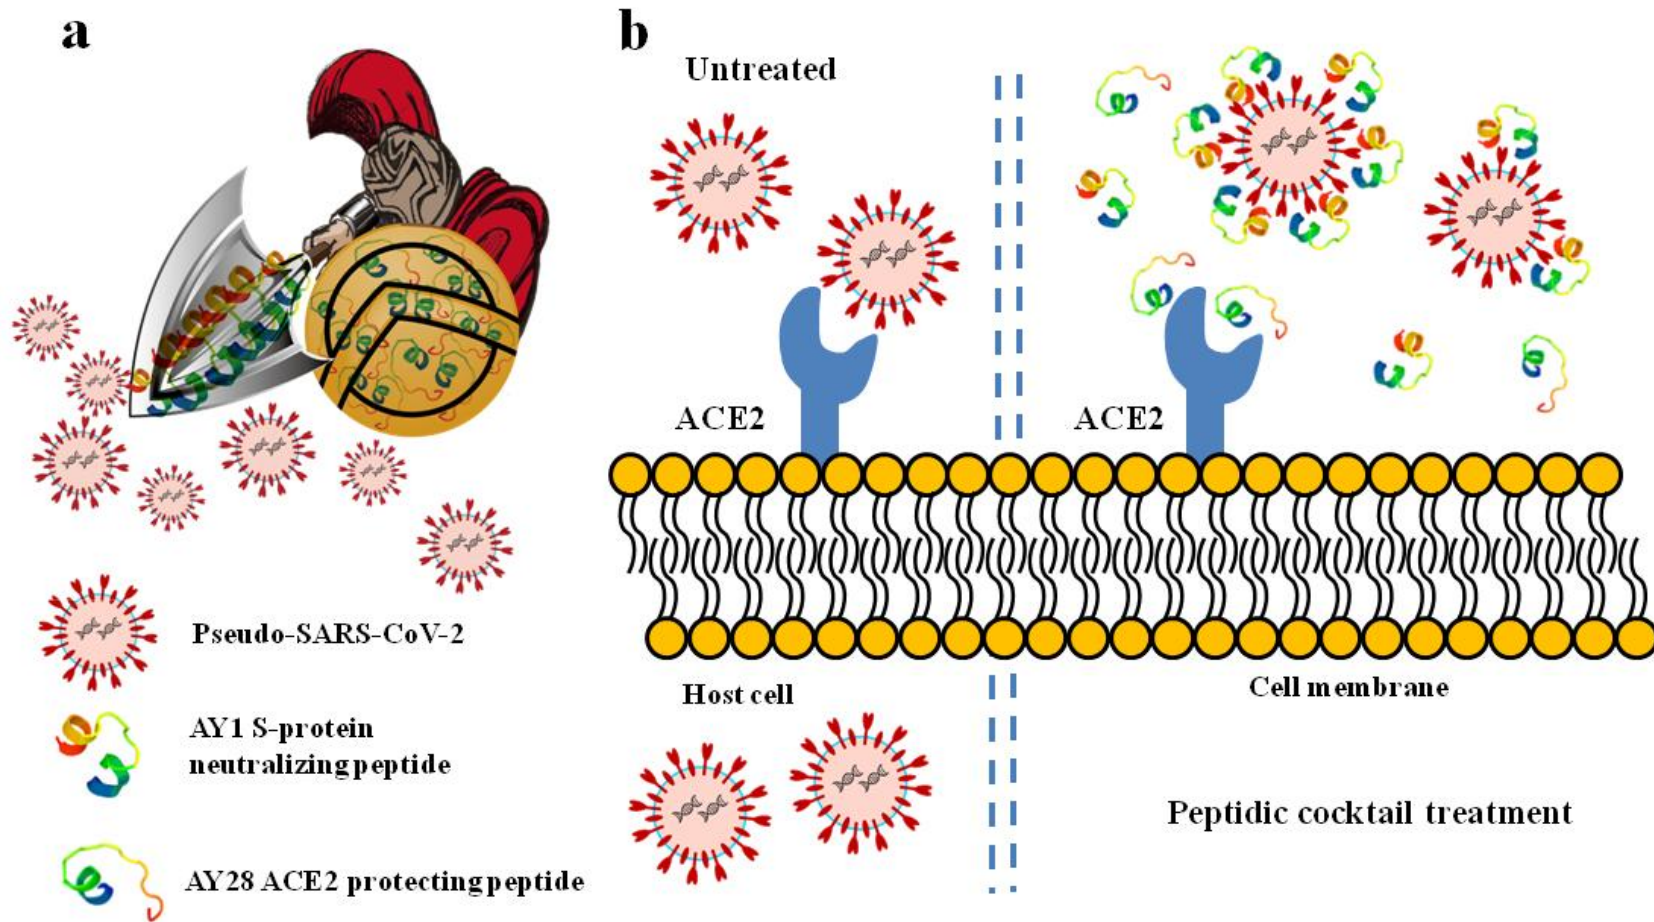

Supplementary Fig. S7 Schematic illustrations of the mechanisms synergistic activity of ACE2-protecting and S-protein neutralizing peptidic cocktail against SARS-CoV-2.



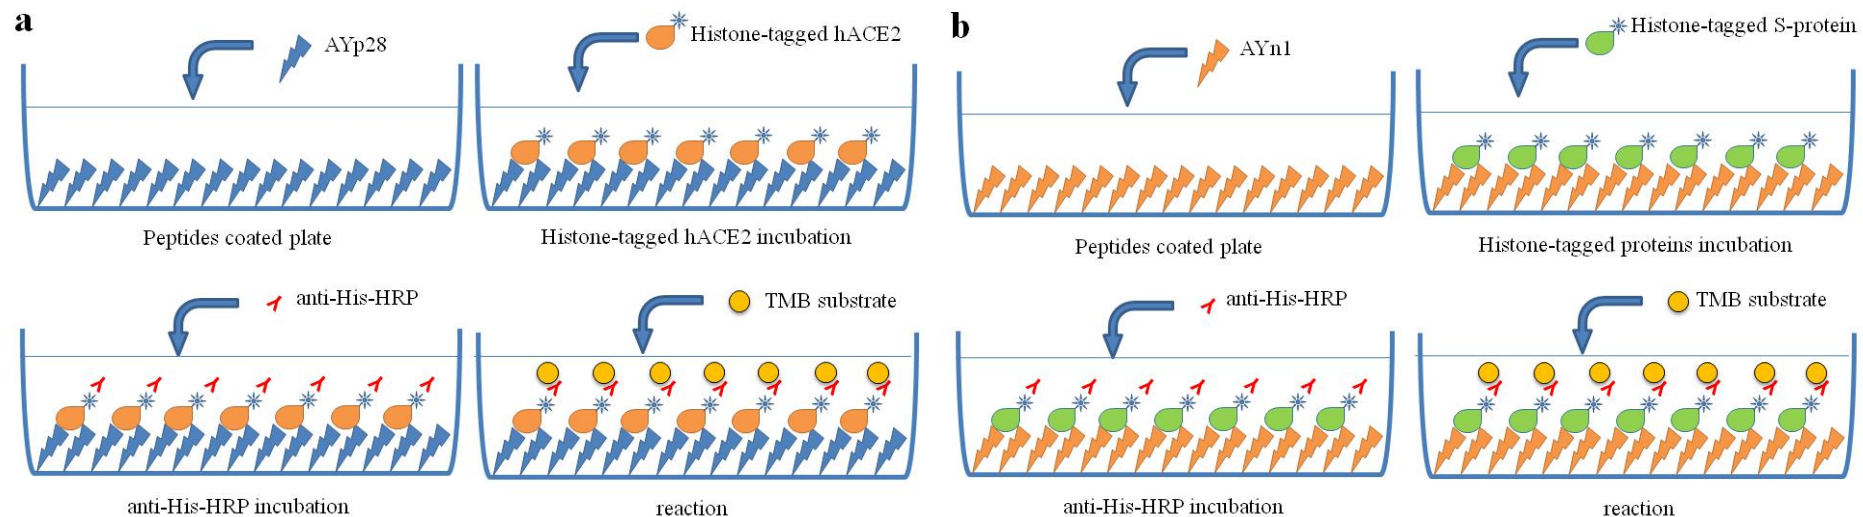

Supplementary Fig. S8 Schematic illustration of experimental protocol of ELISA-like peptides-proteins binding assay. ACE2 protecting peptides or S-protein neutralizing peptides dissolved in deionized water were coated onto ELISA plates and incubated at 4°C for overnight. For the ACE2 (**a**) or S-protein binding assay (**b**), histone-tagged ACE2 (100 ng/mL) or histone-tagged S-protein (10 ng/mL) was incubated with according peptides at 37°C for 2 hours. The bindings of peptide to protein were detected by addition of rabbit anti-His-HRP and incubation at room temperature for 1 hour. The reaction was developed by adding 200  $\mu$ L substrate solution for 15 minutes at 37 °C and was stopped by adding stop solution.
